# Supplementary material
Source: publisher site journal article supplement (https://www.dovepress.com/article/313015)
Supplement: Supplementary file 1 [file get_supplementary_file.php]

## Supplementary materials

**Supplementary Figure 1.** The correlation between the methylation level of cg13861644 (*PIWIL1*) in the blood and in the prefrontal cortex (PFC), entorhinal cortex (EC), superior temporal gyrus (STG) and cerebellum (CER), according to the Blood Brain DNA Methylation Comparison Tool (<https://epigenetics.essex.ac.uk/bloodbrain/>) (Hannon et al. 2015).

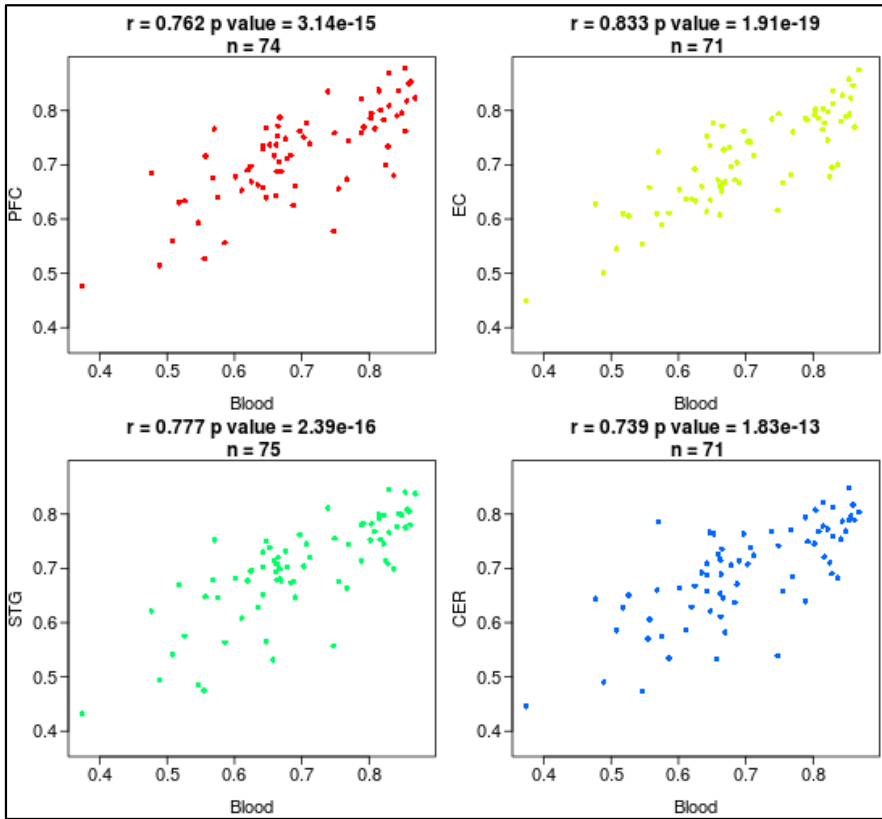

**Supplementary Figure 2.** The correlation between the methylation level of (A) cg04481923 (*MIR886*); (B) cg18678645 (*MIR886*); (C) cg00124993 (*MIR886*); (D) cg18797653 (*MIR886*), in the blood and in the prefrontal cortex (PFC), entorhinal cortex (EC), superior temporal gyrus (STG) and cerebellum (CER), according to the Blood Brain DNA Methylation Comparison Tool (<https://epigenetics.essex.ac.uk/bloodbrain/>) (Hannon et al. 2015).

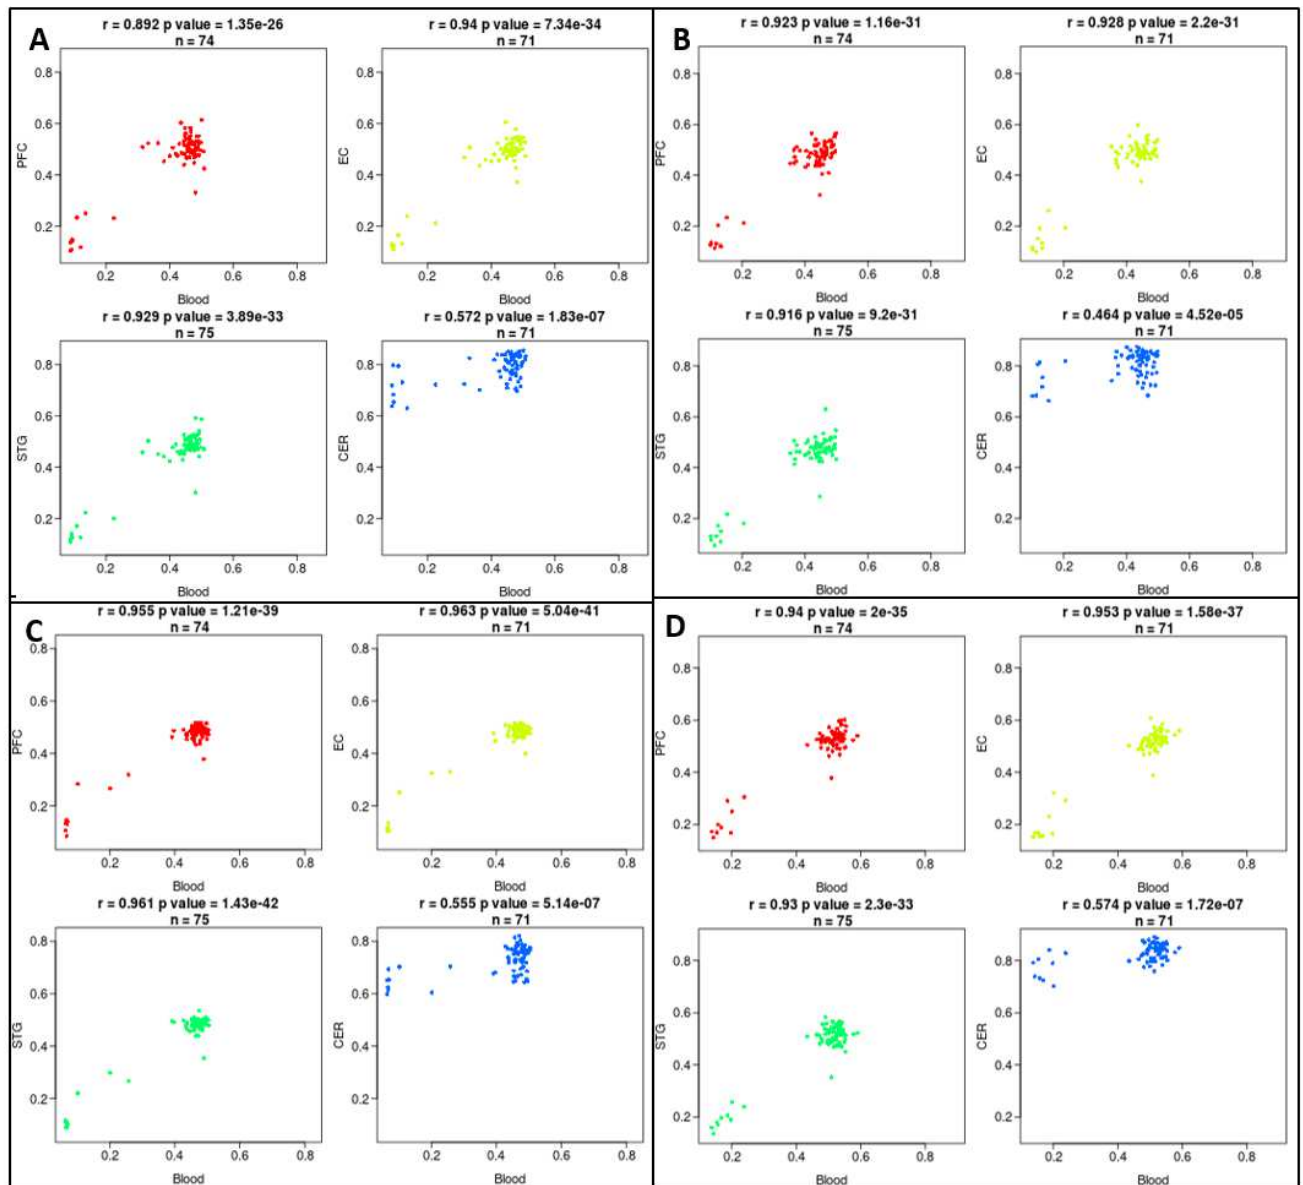

**Supplementary Figure 3.** Cluster Dendrogram showing the 70 gene co-expression modules identified through the WGCNA analysis applied to genome-wide expression data.

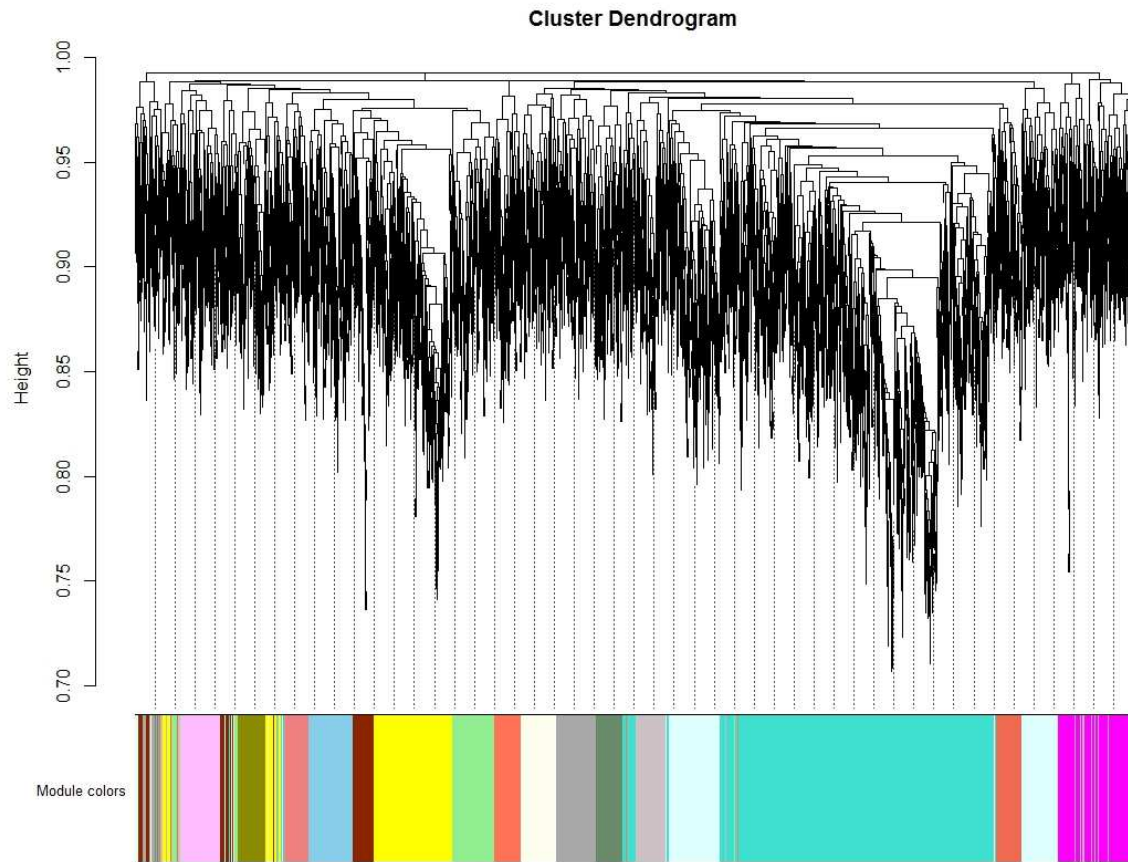

**Supplementary Table 1.** 89 significantly (FDR<0.05,  $\Delta\beta > \pm 0.2$ ) differentially methylated probes (DMPs) between responders and Non-Responders.

| cg         | logFC    | t        | P,Value  | adj,P,Val | NORES_AVG   | RES_AVG  | CHR | MAPINFO  | gene      | feature | cgi     |
|------------|----------|----------|----------|-----------|-------------|----------|-----|----------|-----------|---------|---------|
| cg02173208 | 0.236959 | 11.32382 | 1.45E-07 | 0.001137  | 0.687329077 | 0.924288 | 16  | 53857414 | FTO       | Body    | opensea |
| cg07195891 | -0.28682 | -11.1439 | 1.71E-07 | 0.001176  | 0.69817505  | 0.411357 | 12  | 7900072  | CLEC4C    | 5'UTR   | opensea |
| cg15549821 | 0.244242 | 11.11501 | 1.76E-07 | 0.001176  | 0.331440796 | 0.575683 | 19  | 49342101 | PLEKHA4   | Body    | shore   |
| cg25738128 | 0.204049 | 9.049658 | 1.48E-06 | 0.0023    | 0.682374565 | 0.886424 | 1   | 1.18E+08 | FAM46C    | 5'UTR   | opensea |
| cg23377942 | 0.228341 | 8.973611 | 1.61E-06 | 0.002326  | 0.463225496 | 0.691566 | 16  | 79042805 | WWOX      | Body    | opensea |
| cg25727206 | -0.25323 | -8.87843 | 1.8E-06  | 0.002379  | 0.821778522 | 0.568551 | 19  | 45055395 | CEACAM22P | Body    | opensea |
| cg17667591 | 0.247764 | 8.340882 | 3.36E-06 | 0.002849  | 0.520752379 | 0.768516 | 1   | 17719944 | PADI6     | Body    | opensea |
| cg22915785 | -0.20342 | -7.63531 | 8.01E-06 | 0.003744  | 0.68726438  | 0.483845 | 8   | 1.44E+08 | C8orf31   | TSS1500 | opensea |
| cg13784004 | -0.52282 | -7.02208 | 1.79E-05 | 0.005008  | 0.913829516 | 0.391011 | 18  | 47696733 | MYO5B     | Body    | opensea |
| cg20073962 | -0.29419 | -6.9844  | 1.88E-05 | 0.00509   | 0.7686409   | 0.474453 | 20  | 9640902  | PAK7      | 5'UTR   | opensea |
| cg06099315 | -0.22341 | -6.82494 | 2.33E-05 | 0.005572  | 0.38505959  | 0.161652 | 18  | 112528   | MIR8078   | TSS200  | island  |
| cg02050512 | 0.214241 | 6.539031 | 3.47E-05 | 0.006453  | 0.555598835 | 0.76984  | 7   | 38503404 | AMPH      | Body    | opensea |
| cg17764313 | 0.258944 | 6.484596 | 3.75E-05 | 0.006615  | 0.532154251 | 0.791098 | 3   | 1.27E+08 | MCM2      | Body    | opensea |
| cg09254210 | 0.201152 | 6.463233 | 3.86E-05 | 0.006702  | 0.532112085 | 0.733264 | 14  | 61873622 | PRKCH     | Body    | opensea |
| cg20304530 | -0.20488 | -6.426   | 4.07E-05 | 0.006873  | 0.911513431 | 0.706638 | 15  | 88502498 | NTRK3     | Body    | opensea |
| cg13861644 | -0.29151 | -6.3779  | 4.36E-05 | 0.007067  | 0.800179415 | 0.508668 | 12  | 1.31E+08 | PIWIL1    | TSS1500 | shore   |
| cg10617796 | 0.203682 | 6.369361 | 4.42E-05 | 0.007105  | 0.408815637 | 0.612498 | 5   | 83478502 | EDIL3     | Body    | opensea |
| cg16454099 | -0.27945 | -6.23062 | 5.39E-05 | 0.007707  | 0.649451224 | 0.369996 | 7   | 92818323 | HEPACAM2  | 3'UTR   | opensea |
| cg08166072 | -0.21578 | -6.06547 | 6.87E-05 | 0.008479  | 0.48181594  | 0.266035 | 2   | 46213920 | PRKCE     | Body    | opensea |
| cg14398247 | -0.25681 | -5.92232 | 8.49E-05 | 0.009261  | 0.894594073 | 0.637783 | 22  | 43216462 | ARFGAP3   | Body    | opensea |
| cg25032089 | 0.205128 | 5.848798 | 9.47E-05 | 0.009671  | 0.653413852 | 0.858542 | 17  | 46643351 | HOXB3     | 5'UTR   | shore   |
| cg26844603 | -0.25603 | -5.79724 | 0.000102 | 0.009938  | 0.690066288 | 0.434036 | 2   | 1.13E+08 | TMEM87B   | Body    | opensea |
| cg06789517 | 0.348359 | 5.701099 | 0.000118 | 0.010536  | 0.417515238 | 0.765874 | 1   | 1.15E+08 | SYT6      | 3'UTR   | opensea |
| cg21048050 | -0.32168 | -5.68942 | 0.000121 | 0.010602  | 0.528568483 | 0.206886 | 15  | 51912957 | DMXL2     | Body    | shore   |

|            |          |          |          |          |             |          |    |          |              |         |         |
|------------|----------|----------|----------|----------|-------------|----------|----|----------|--------------|---------|---------|
| cg27630820 | -0.25933 | -5.63065 | 0.000132 | 0.010962 | 0.72534992  | 0.466018 | 12 | 1.31E+08 | PIWIL1       | TSS200  | shore   |
| cg26715042 | -0.21033 | -5.60663 | 0.000137 | 0.011144 | 0.677555133 | 0.467227 | 6  | 49681307 | CRISP2       | TSS200  | opensea |
| cg04481923 | -0.26175 | -5.60655 | 0.000137 | 0.011144 | 0.493606327 | 0.231854 | 5  | 1.35E+08 | MIR886       | Body    | island  |
| cg19424457 | -0.24726 | -5.57592 | 0.000143 | 0.011362 | 0.730067036 | 0.482807 | 12 | 1.31E+08 | PIWIL1       | TSS200  | shore   |
| cg18678645 | -0.24063 | -5.33409 | 0.000209 | 0.013328 | 0.453350804 | 0.21272  | 5  | 1.35E+08 | MIR886       | TSS200  | island  |
| cg06489993 | -0.24246 | -5.30491 | 0.000219 | 0.013594 | 0.638550168 | 0.39609  | 19 | 47082996 | PPP5D1       | Body    | opensea |
| cg18976291 | -0.20509 | -5.15752 | 0.000277 | 0.015032 | 0.556012827 | 0.350926 | 15 | 92464719 | SLCO3A1      | Body    | opensea |
| cg03983883 | 0.218109 | 5.132535 | 0.000288 | 0.015295 | 0.280657397 | 0.498767 | 8  | 79577618 | ZC2HC1A      | TSS1500 | shore   |
| cg07670516 | 0.221083 | 5.051683 | 0.000328 | 0.016185 | 0.381243725 | 0.602327 | 17 | 5019840  | ZNF232       | 5'UTR   | island  |
| cg00124993 | -0.20275 | -4.99507 | 0.000359 | 0.016808 | 0.496047771 | 0.293294 | 5  | 1.35E+08 | MIR886       | TSS200  | island  |
| cg26094651 | -0.34421 | -4.91282 | 0.000411 | 0.017822 | 0.807758141 | 0.463545 | 2  | 1802045  | MYT1L        | Body    | island  |
| cg02873954 | -0.21584 | -4.88727 | 0.000429 | 0.018175 | 0.724385914 | 0.508546 | 21 | 45161415 | PDXK         | Body    | opensea |
| cg15365744 | 0.312758 | 4.836207 | 0.000466 | 0.018946 | 0.471208187 | 0.783967 | 12 | 1.07E+08 | POLR3B       | Body    | opensea |
| cg03321588 | -0.20156 | -4.80965 | 0.000487 | 0.019336 | 0.464078696 | 0.262521 | 3  | 56787713 | ARHGEF3      | Body    | opensea |
| cg21351392 | -0.20957 | -4.76814 | 0.000521 | 0.01987  | 0.691611832 | 0.482038 | 6  | 1.62E+08 | AGPAT4       | Body    | opensea |
| cg02780130 | -0.20253 | -4.74006 | 0.000546 | 0.020277 | 0.353148076 | 0.150617 | 12 | 312753   | LOC101929384 | TSS200  | island  |
| cg07469075 | -0.32744 | -4.73749 | 0.000548 | 0.020315 | 0.710877135 | 0.383437 | 11 | 35548139 | PAMR1        | TSS1500 | shore   |
| cg08801017 | -0.22126 | -4.71382 | 0.00057  | 0.020689 | 0.580356149 | 0.359101 | 13 | 19918525 | LOC100101938 | Body    | shore   |
| cg18865685 | -0.22819 | -4.67949 | 0.000604 | 0.021241 | 0.763325039 | 0.535136 | 1  | 1.77E+08 | ASTN1        | Body    | opensea |
| cg18797653 | -0.21139 | -4.66822 | 0.000615 | 0.021422 | 0.512706915 | 0.301316 | 5  | 1.35E+08 | MIR886       | TSS1500 | shore   |
| cg17497608 | -0.27603 | -4.62813 | 0.000658 | 0.022076 | 0.749843229 | 0.473817 | 7  | 90896701 | FZD1         | 1stExon | shore   |
| cg18319102 | -0.21599 | -4.60677 | 0.000682 | 0.02244  | 0.520251945 | 0.304258 | 12 | 1.31E+08 | PIWIL1       | TSS200  | shore   |
| cg12355172 | -0.20669 | -4.60363 | 0.000686 | 0.022497 | 0.535138931 | 0.328452 | 11 | 67418315 | ACY3         | TSS200  | opensea |
| cg14755254 | -0.38539 | -4.60342 | 0.000686 | 0.022499 | 0.433199671 | 0.047812 | 8  | 637813   | ERICH1       | Body    | island  |
| cg21862353 | -0.26948 | -4.5691  | 0.000726 | 0.023065 | 0.726553307 | 0.45707  | 2  | 1801628  | MYT1L        | Body    | island  |
| cg17345276 | -0.24823 | -4.55618 | 0.000742 | 0.023279 | 0.904868816 | 0.656636 | 2  | 27349220 | ABHD1        | Body    | shelf   |
| cg13983884 | 0.273158 | 4.534316 | 0.00077  | 0.023654 | 0.339997868 | 0.613156 | 1  | 1.55E+08 | KCNN3        | Body    | opensea |

|            |          |          |          |          |             |          |    |          |              |         |         |
|------------|----------|----------|----------|----------|-------------|----------|----|----------|--------------|---------|---------|
| cg11931211 | -0.21454 | -4.52174 | 0.000787 | 0.023901 | 0.723062176 | 0.508522 | 12 | 1.31E+08 | PIWIL1       | TSS200  | island  |
| cg08713344 | -0.2419  | -4.4074  | 0.000955 | 0.026113 | 0.889735636 | 0.647839 | 10 | 3183772  | PITRM1-AS1   | TSS200  | shelf   |
| cg01093476 | -0.22263 | -4.38564 | 0.000991 | 0.026555 | 0.261249994 | 0.038617 | 5  | 32020512 | PDZD2        | Body    | opensea |
| cg21104276 | -0.20402 | -4.30821 | 0.001131 | 0.028175 | 0.918131597 | 0.714107 | 7  | 90896572 | FZD1         | 1stExon | island  |
| cg01053087 | -0.21361 | -4.28674 | 0.001174 | 0.028643 | 0.248897833 | 0.03529  | 8  | 637909   | ERICH1       | Body    | island  |
| cg04332058 | 0.240916 | 4.279809 | 0.001188 | 0.028805 | 0.529771121 | 0.770688 | 14 | 23548787 | ACIN1        | Body    | opensea |
| cg03678595 | 0.217751 | 4.271122 | 0.001205 | 0.029005 | 0.709916915 | 0.927668 | 14 | 78023855 | SPTLC2       | Body    | opensea |
| cg08454824 | -0.20856 | -4.24326 | 0.001265 | 0.02967  | 0.734397411 | 0.525833 | 8  | 637468   | ERICH1       | Body    | island  |
| cg18781968 | 0.250137 | 4.209456 | 0.001341 | 0.030445 | 0.417419105 | 0.667556 | 3  | 29805756 | RBMS3        | Body    | opensea |
| cg27237671 | -0.24154 | -4.2055  | 0.00135  | 0.030553 | 0.54468673  | 0.303144 | 2  | 676223   | TMEM18       | Body    | shore   |
| cg16288713 | 0.323876 | 4.197498 | 0.001369 | 0.030751 | 0.17677505  | 0.500651 | 13 | 79234144 | RNF219       | TSS1500 | shore   |
| cg05194426 | -0.21881 | -4.18461 | 0.001399 | 0.031068 | 0.31044473  | 0.091633 | 10 | 1.35E+08 | CYP2E1       | Body    | shore   |
| cg18105134 | -0.23637 | -4.15032 | 0.001485 | 0.031952 | 0.813757544 | 0.57739  | 13 | 1.14E+08 | PROZ         | Body    | opensea |
| cg12080266 | 0.273935 | 4.088734 | 0.001653 | 0.033548 | 0.700193774 | 0.974129 | 21 | 36060640 | CLIC6        | Body    | opensea |
| cg18263335 | -0.26371 | -4.06077 | 0.001735 | 0.03433  | 0.765601458 | 0.501894 | 2  | 676133   | TMEM18       | Body    | shore   |
| cg19754622 | 0.265083 | 4.058601 | 0.001742 | 0.034373 | 0.3338445   | 0.598928 | 10 | 1.34E+08 | STK32C       | Body    | shelf   |
| cg18706028 | -0.2002  | -4.0356  | 0.001813 | 0.035    | 0.703644752 | 0.503449 | 11 | 6292490  | CCKBR        | Body    | island  |
| cg25052156 | 0.227565 | 4.027922 | 0.001838 | 0.035227 | 0.556445419 | 0.78401  | 10 | 1.23E+08 | FGFR2        | 5'UTR   | shore   |
| cg10547329 | 0.284896 | 3.99608  | 0.001943 | 0.036163 | 0.467818654 | 0.752715 | 5  | 1.72E+08 | SH3PXD2B     | Body    | opensea |
| cg24764243 | 0.366206 | 3.989228 | 0.001966 | 0.036339 | 0.41710056  | 0.783307 | 7  | 1.08E+08 | NRCAM        | 5'UTR   | opensea |
| cg06378142 | -0.37022 | -3.97221 | 0.002026 | 0.036872 | 0.69130447  | 0.32108  | 19 | 50119633 | PRR12        | Body    | shore   |
| cg01480180 | -0.25751 | -3.96913 | 0.002037 | 0.03697  | 0.699306951 | 0.441798 | 7  | 90896329 | FZD1         | 1stExon | island  |
| cg10318771 | 0.304096 | 3.928303 | 0.002188 | 0.038279 | 0.525628093 | 0.829724 | 2  | 2.07E+08 | ADAM23       | Body    | opensea |
| cg18467790 | 0.311633 | 3.917569 | 0.00223  | 0.038653 | 0.457647155 | 0.76928  | 7  | 4871879  | RADIL        | Body    | shelf   |
| cg24521141 | 0.21625  | 3.910168 | 0.002259 | 0.038886 | 0.692038576 | 0.908289 | 2  | 38744309 | LOC101929596 | TSS1500 | opensea |
| cg19585676 | -0.37024 | -3.8049  | 0.002721 | 0.042489 | 0.586190186 | 0.215952 | 6  | 29913343 | HLA-A        | 3'UTR   | shore   |
| cg01458105 | 0.204366 | 3.791464 | 0.002786 | 0.042992 | 0.315391902 | 0.519758 | 10 | 1.34E+08 | STK32C       | Body    | shelf   |

|            |          |          |          |          |             |          |    |          |         |         |         |
|------------|----------|----------|----------|----------|-------------|----------|----|----------|---------|---------|---------|
| cg20283771 | -0.20008 | -3.78799 | 0.002803 | 0.043107 | 0.803941427 | 0.603863 | 16 | 88943542 | CBFA2T3 | Body    | island  |
| cg18872420 | 0.300785 | 3.744296 | 0.00303  | 0.04477  | 0.413390948 | 0.714176 | 14 | 78023429 | SPTLC2  | Body    | opensea |
| cg15921713 | -0.22446 | -3.72528 | 0.003134 | 0.04553  | 0.464198043 | 0.239743 | 7  | 16602973 | LRRC72  | Body    | opensea |
| cg25830530 | -0.26584 | -3.69853 | 0.003287 | 0.046577 | 0.728616988 | 0.46278  | 9  | 36276951 | GNE     | 1stExon | opensea |
| cg24564187 | 0.205113 | 3.686661 | 0.003357 | 0.047067 | 0.380258995 | 0.585372 | 11 | 1.3E+08  | TMEM45B | 5'UTR   | shelf   |
| cg04794593 | -0.20796 | -3.6845  | 0.00337  | 0.047165 | 0.656954962 | 0.448992 | 1  | 7598988  | CAMTA1  | Body    | opensea |
| cg06150148 | 0.21894  | 3.683704 | 0.003375 | 0.047188 | 0.631226667 | 0.850166 | 2  | 1.01E+08 | LONRF2  | Body    | opensea |
| cg12284872 | -0.30867 | -3.67645 | 0.003418 | 0.047474 | 0.768664574 | 0.459991 | 1  | 2.05E+08 | KLHDC8A | Body    | shore   |
| cg23403192 | -0.24104 | -3.66539 | 0.003487 | 0.047917 | 0.898906147 | 0.657866 | 21 | 30396327 | USP16   | TSS1500 | shore   |
| cg04118610 | 0.413706 | 3.645412 | 0.003613 | 0.048739 | 0.234596744 | 0.648303 | 4  | 62707027 | LPHN3   | Body    | opensea |
| cg03644281 | -0.24544 | -3.62298 | 0.003761 | 0.049691 | 0.899648194 | 0.654211 | 6  | 41068752 | NFYA    | 3'UTR   | island  |
